# Supplementary material for: New gene models and alternative splicing in the maize pathogen Colletotrichum graminicola revealed by RNA-Seq analysis
Source: PubMed Central journal article supplement (PMC4194422; doi:10.1186/1471-2164-15-842), 2014-10-02
Supplement: 12864_2014_6520_MOESM5_ESM.pdf [file 12864_2014_6520_MOESM5_ESM.pdf]

# Additional file 7

single nucleotide  
substitution (12)

nTARs (3)

single nucleotide  
insertion/  
deletion (8)

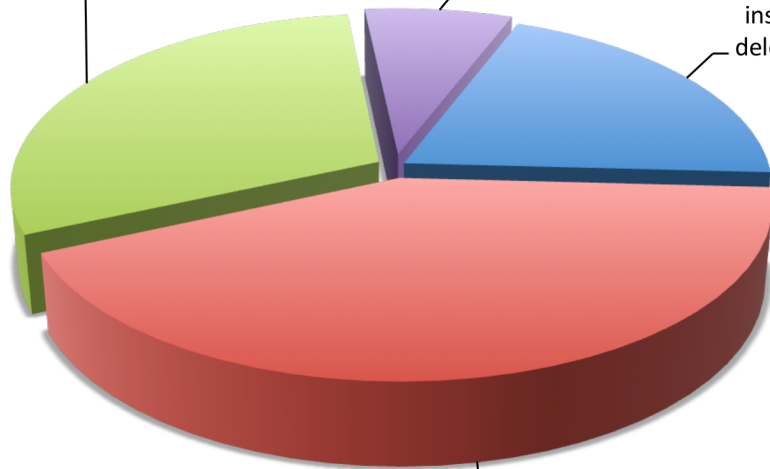

silent (17)
